# Supplementary material for: Dynamics of the island mass effect – Part 1: Detecting the extent
Source: Copernicus journal article supplement (doi:10.5194/bg-22-3207-2025), 2025-07-04
Supplement: Supplementary file 1 [file bg-22-3207-2025-supplement.zip]

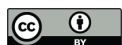

## *Supplement of*

# **Dynamics of the island mass effect – Part 1: Detecting the extent**

**Guillaume Bourdin et al.**

*Correspondence to:* Guillaume Bourdin ([guillaume.bourdin@maine.edu](mailto:guillaume.bourdin@maine.edu))

- [bg-22-3207-2025-supplement-title-page.pdf](#)
- [Animation S1.gif](#)
- [Animation S2.gif](#)
- [Animation S3.gif](#)
- [Animation S4.gif](#)
- [dynamic\\_IME\\_animation\\_README.md](#)

The copyright of individual parts of the supplement might differ from the article licence.
